# Supplementary material for: Disturbed Flow Enhances Inflammatory Signaling and Atherogenesis by Increasing Thioredoxin-1 Level in Endothelial Cell Nuclei
Source: PubMed Central journal article supplement (PMC4180949; doi:10.1371/journal.pone.0108346), 2014-09-29
Supplement: pone.0108346.s001.pdf [file pone.0108346.s001.pdf]

**Table S1.** Redox ICAT/MS-measured % oxidation of peptidyl Cys/protein of RCA and LCA in WT mice. The data show 146 peptidyl Cys with % oxidation (%ox) value identified from RCA and LCA of WT mice.

| Peptide                  | Cys   | Accession      | Annotation                                                         | %ox<br>RCA | %ox<br>LCA |
|--------------------------|-------|----------------|--------------------------------------------------------------------|------------|------------|
| ACLISLGYDVENDR           | C794  | NP_068695.1    | actinin alpha 4                                                    | 21.9       | 36.6       |
| ACPVGHHLHR               | C864  | NP_783572.2    | latent transforming growth factor beta binding protein 4 isoform a | 55.4       | 67.6       |
| AGLSSGFVGCVR             | C3248 | XP_001477365.1 | PREDICTED: similar to perlecan (heparan sulfate proteoglycan 2)    | 46.4       | 46.8       |
| AHGQDLGTAGSCLR           | C1493 | NP_034061.2    | collagen, type IV, alpha 1                                         | 61.8       | 75.1       |
| AHNQDLGLAGSCLAR          | C1532 | NP_034062.2    | procollagen, type IV, alpha 2                                      | 69.4       | 67.1       |
| AHSVEEER                 | C888  | XP_001477365.1 | PREDICTED: similar to perlecan (heparan sulfate proteoglycan 2)    | 78.0       | 88.5       |
| AHVAPCFDASK              | C1157 | NP_034357.2    | filamin, alpha                                                     | 3.3        | 29.2       |
| ALANSLACQGK              | C339  | NP_031464.1    | aldolase 1, A isoform                                              | 16.1       | 40.3       |
| ALIQCAK                  | C950  | NP_033528.3    | vinculin                                                           | 27.1       | 32.0       |
| APSVANIGSHCDLSLK         | C2152 | NP_034357.2    | filamin, alpha                                                     | 18.5       | 26.7       |
| ASPFIECHGR               | C1615 | NP_031760.2    | procollagen, type IV, alpha 3                                      | 76.1       | 82.8       |
| AVIFCLSADK               | C39   | NP_062745.1    | destrin                                                            | 32.4       | 58.5       |
| CAELEEEELK               | C190  | NP_077745.2    | tropomyosin 1, alpha                                               | 0.6        | 7.6        |
| CAPGVVGPTADIDFDIIR       | C810  | NP_034357.2    | filamin, alpha                                                     | 10.3       | 40.4       |
| CATSTPAFFAEK             | C270  | NP_034860.2    | annexin A1                                                         | 32.4       | 32.4       |
| CAVVDVPFGGAK             | C172  | NP_032159.1    | glutamate dehydrogenase 1                                          | 11.6       | 35.3       |
| CDDLEALKK                | C64   | NP_034708.1    | integrin beta 1 (fibronectin receptor beta)                        | 65.3       | 82.5       |
| CDKEVYFAER               | C7    | NP_031789.1    | cysteine-rich protein 1 (intestinal)                               | 30.7       | 42.4       |
| CDRVDQLTAQLADLAAR        | C545  | NP_033528.3    | vinculin                                                           | 27.1       | 32.1       |
| CDSGFALDSEER             | C1057 | NP_032019.2    | fibrillin 1                                                        | 36.4       | 68.1       |
| CDVDIR                   | C286  | NP_780706.1    | actin, beta-like 2                                                 | 24.2       | 40.5       |
| CEKPFLGHR                | C227  | NP_659111.1    | LIM and senescent cell antigen like domains 2                      | 18.6       | 38.9       |
| CGDSVYAAEK               | C122  | NP_031818.3    | cysteine and glycine-rich protein 2                                | 27.7       | 28.8       |
| CGEVVQEHVIR              | C248  | NP_598515.3    | filamin binding LIM protein 1                                      | 31.9       | 48.1       |
| CGTGIVGVFVK              | C261  | NP_058557.2    | carboxyl terminal LIM domain protein 1                             | 35.9       | 29.5       |
| CIESLIAVFQK              | C8    | NP_058020.1    | S100 calcium binding protein A11 (calizzarin)                      | 0.5        | 12.0       |
| CIIPNHEKR                | C678  | NP_780469.1    | myosin heavy chain 10, non-muscle                                  | 7.9        | 18.3       |
| CILLSNLSNTSHAPK          | C1464 | NP_032014.3    | fatty acid synthase                                                | 17.9       | 27.0       |
| CLAFHDISPQAPTHFLVIP<br>K | C38   | NP_032274.1    | histidine triad nucleotide binding protein 1                       | 11.7       | 34.8       |
| CLGIPTR                  | C290  | NP_033399.1    | transglutaminase 2, C polypeptide                                  | 12.6       | 9.1        |
| CLHPLASETFVSK            | C71   | NP_034341.2    | four and a half LIM domains 1 isoform 3                            | 21.7       | 32.0       |

|                                   |               |                |                                                                          |      |      |
|-----------------------------------|---------------|----------------|--------------------------------------------------------------------------|------|------|
| CLIEILASR                         | C111          | NP_036052.2    | annexin A10                                                              | 1.1  | 7.9  |
| CPETLFQPSFIGMESAGI<br>HETTYNSIM*K | C259          | NP_033738.1    | actin, alpha, cardiac                                                    | 2.9  | 38.9 |
| CQLEINFNTLQTK                     | C352          | NP_068695.1    | actinin alpha 4                                                          | 10.4 | 32.9 |
| CSGPGLSPGM*VR                     | C1453         | NP_034357.2    | filamin, alpha                                                           | 1.5  | 28.2 |
| CSVNLANK                          | C255          | NP_034341.2    | four and a half LIM domains 1<br>isoform 3                               | 25.7 | 33.9 |
| CSYDEHAK                          | C58           | NP_033784.2    | albumin                                                                  | 26.2 | 36.9 |
| CSYQPTM*EGVHTVHVT<br>FAGVPIPR     | C444          | NP_034357.2    | filamin, alpha                                                           | 17.3 | 28.1 |
| CVNLIGK                           | C1173         | NP_032019.2    | fibrillin 1                                                              | 65.7 | 79.7 |
| CVSTLLDLIQTK                      | C391          | NP_082191.1    | adaptor-related protein<br>complex 2, beta 1 subunit<br>isoform b        | 16.6 | 25.4 |
| CVVVGDAVGK                        | C24           | NP_075764.1    | ras homolog gene family,<br>member J                                     | 53.8 | 46.9 |
| CYEMASHLR                         | C128          | NP_035202.1    | profilin 1                                                               | 28.9 | 39.7 |
| CAPGVVGPTADIDFDIIR                | C810          | NP_034357.2    | filamin, alpha                                                           | 22.9 | 36.1 |
| CDIDIR                            | C333          | NP_113581.1    | actin-like 6B                                                            | 20.4 | 37.9 |
| CIVVEEGK                          | -             | NP_062745.1    | destrin                                                                  | 29.3 | 45.8 |
| CLHPLASETFVSK                     | C71           | NP_034341.2    | four and a half LIM domains 1<br>isoform 3                               | 21.7 | 32.0 |
| CNEGYEVAPDGR                      | C1960         | NP_032019.2    | fibrillin 1                                                              | 52.8 | 58.5 |
| CNIHYTGR                          | -             | NP_034859.2    | lysyl oxidase-like 1                                                     | 97.3 | 96.5 |
| CSNGLVAGFQSR                      | -             | NP_062733.1    | dermatopontin                                                            | 79.0 | 73.4 |
| CSPDPGLTALLSDHR                   | -             | NP_059067.2    | hemopexin                                                                | 40.4 | 66.6 |
| DAFCVFEQNQGLPLR                   | C430          | NP_033805.1    | amine oxidase, copper<br>containing 3                                    | 48.2 | 57.6 |
| DGILCEFINK                        | C61           | NP_034052.2    | calponin 1                                                               | 4.8  | 31.9 |
| DGSASGTTLLEALDCILP<br>PTRPTDKPLR  | C234          | NP_034236.2    | eukaryotic translation<br>elongation factor 1 alpha 1                    | 7.7  | 10.8 |
| EDQSILCTGESGAGK                   | C172          | NP_071855.2    | myosin, heavy polypeptide 9,<br>non-muscle isoform 1                     | 8.3  | 18.8 |
| EEPCLLKR                          | C1989         | NP_034357.2    | filamin, alpha                                                           | 6.9  | 15.7 |
| EIVHIQAGQCGNQIGAK                 | C12           | NP_075768.1    | tubulin, beta 3                                                          | 16.7 | 30.7 |
| EKLCYVALDFENEM*ATA<br>ASSSLEK     | C219          | NP_033738.1    | actin, alpha, cardiac                                                    | 46.8 | 71.3 |
| ELAHSLAELQSCPQEEG<br>PGGR         | C408          | NP_038898.1    | smoothelin                                                               | 15.3 | 37.7 |
| EYEELCPR                          | C1010         | NP_032019.2    | fibrillin 1                                                              | 52.3 | 63.0 |
| EYLPIGGLAEFCK                     | C106          | NP_034455.1    | glutamate oxaloacetate<br>transaminase 2, mitochondrial                  | 12.1 | 16.2 |
| FCTGLTQIETLFK                     | C254          | NP_067248.1    | creatine kinase, brain                                                   | 26.8 | 23.0 |
| FNAHGDAANTIVCNTK                  | C61           | NP_032521.1    | lectin, galactose binding,<br>soluble 1                                  | 19.6 | 45.2 |
| FTPAVCGLR                         | -             | NP_001107021.1 | latent transforming growth<br>factor beta binding protein 4<br>isoform b | 74.1 | 79.0 |
| FVFHNEQVYCPDCAK                   | C273;C<br>276 | NP_034341.2    | four and a half LIM domains 1<br>isoform 3                               | 24.5 | 31.3 |
| GCDVVVIPAGVPR                     | C93           | NP_032643.2    | malate dehydrogenase 2, NAD<br>(mitochondrial)                           | 18.9 | 24.8 |
| GCTFLVGLIQK                       | C405          | NP_033924.2    | calpain 2                                                                | 16.7 | 35.7 |
| GENHCGIESEIVAGIPR                 | C319          | NP_031824.1    | cathepsin B preproprotein                                                | 25.5 | 37.3 |

|                               |       |                |                                                                                                                                                                          |      |      |
|-------------------------------|-------|----------------|--------------------------------------------------------------------------------------------------------------------------------------------------------------------------|------|------|
| GFQFVSSSLPDICYR               | -     | NP_001103215.1 | cellular nucleic acid binding protein isoform 2                                                                                                                          | 56.9 | 65.1 |
| GHFFVEDQIYCEK                 | C305  | NP_058557.2    | carboxyl terminal LIM domain protein 1                                                                                                                                   | 20.6 | 40.3 |
| GIFPVLCK                      | C474  | NP_035229.2    | pyruvate kinase, muscle                                                                                                                                                  | 4.7  | 17.9 |
| GLGTDEDSLIEIICSR              | C133  | XP_001474833.1 | PREDICTED: similar to Annexin A2 (Annexin II) (Lipocortin II) (Calpactin I heavy chain) (Chromobindin-8) (p36) (Protein I) (Placental anticoagulant protein IV) (PAP-IV) | 8.3  | 14.5 |
| GQCVKPLFGAVTK                 | C672  | NP_032019.2    | fibrillin 1                                                                                                                                                              | 63.9 | 76.3 |
| GSHCSGSGDPAEYNLR              | C572  | NP_001002011.2 | lamin A isoform A                                                                                                                                                        | 8.9  | 26.9 |
| GSLGTSGETCR                   | C892  | NP_032331.2    | perlecan (heparan sulfate proteoglycan 2)                                                                                                                                | 39.9 | 63.8 |
| GTFASLSELHCDK                 | C94   | NP_058652.1    | hemoglobin, beta adult minor chain                                                                                                                                       | 13.2 | 20.3 |
| GVVNFAVVITDGHVTGSP<br>CGGIK   | C185  | NP_666119.1    | collagen, type VI, alpha 2                                                                                                                                               | 54.4 | 69.0 |
| HEQNIDCGGGYVK                 | C105  | NP_031617.1    | calreticulin                                                                                                                                                             | 21.5 | 31.0 |
| HFCPNVPIILVGK                 | C107  | NP_031510.2    | ras homolog gene family, member C                                                                                                                                        | 15.4 | 20.8 |
| HHCPNTPIILVGTK                | C105  | NP_033033.1    | RAS-related C3 botulinum substrate 1                                                                                                                                     | 9.3  | 26.3 |
| HPNSFICKL                     | C288  | NP_032786.1    | osteoglycin                                                                                                                                                              | 29.0 | 52.9 |
| HSQTTDDPLCPPGTK               | -     | NP_034061.2    | collagen, type IV, alpha 1                                                                                                                                               | 22.9 | 83.8 |
| IASVKPSDAGTYVCQAQ<br>NALGTAQK | -     | XP_001477365.1 | PREDICTED: similar to perlecan (heparan sulfate proteoglycan 2)                                                                                                          | 56.1 | 69.4 |
| IDQLECDHQLIQEALIFDN<br>K      | C690  | NP_598917.1    | actinin, alpha 1                                                                                                                                                         | 10.8 | 4.1  |
| IIPGFMCQGGDFTR                | C62   | XP_001002180.2 | PREDICTED: hypothetical protein                                                                                                                                          | 11.4 | 32.8 |
| IYGGSVTGATCK                  | C218  | NP_033441.1    | triosephosphate isomerase 1                                                                                                                                              | 11.9 | 39.7 |
| ILYSQCGDVM*R                  | C32   | NP_034990.1    | myosin, light polypeptide 6, alkali, smooth muscle and non-muscle                                                                                                        | 20.7 | 52.4 |
| IQLEHHISPGDFPDCQK             | C356  | NP_694708.2    | EH-domain containing 2                                                                                                                                                   | 5.6  | 19.7 |
| ISPDLCGR                      |       | NP_032019.2    | fibrillin 1                                                                                                                                                              | 53.2 | 71.7 |
| IVSPSGAAVPCK                  | C1018 | NP_034357.2    | filamin, alpha                                                                                                                                                           | 1.6  | 2.6  |
| IVSPSGAAVPCKVEPGLG<br>ADNSVVR | C1018 | NP_034357.2    | filamin, alpha                                                                                                                                                           | 5.0  | 37.0 |
| KITISDCGQL                    | C161  | XP_001002180.2 | PREDICTED: hypothetical protein                                                                                                                                          | 21.4 | 40.4 |
| KPVDQYEDCYLAR                 | C260  | NP_598738.1    | transferrin                                                                                                                                                              | 47.3 | 73.1 |
| KTYITDPVSAPCAPPLQP<br>K       | C365  | NP_848780.2    | LIM domain containing preferred translocation partner in lipoma                                                                                                          | 8.9  | 17.6 |
| LCSEQGNHPK                    | C554  | NP_038635.1    | myosin, heavy polypeptide 11, smooth muscle                                                                                                                              | 12.7 | 31.5 |
| LCSGVLGTVVHGK                 | C79   | NP_062732.1    | mitochondrial carrier homolog 2                                                                                                                                          | 17.0 | 16.4 |
| LCYVALDFEQEMATAAS<br>SSSLEK   | C217  | NP_031419.1    | actin, beta, cytoplasmic                                                                                                                                                 | 28.8 | 16.1 |
| LHQVSPVDSGEYVCR               | -     | XP_001477365.1 | PREDICTED: similar to perlecan (heparan sulfate proteoglycan 2)                                                                                                          | 42.6 | 38.5 |

|                                   |       |                |                                                                                                      |      |      |
|-----------------------------------|-------|----------------|------------------------------------------------------------------------------------------------------|------|------|
| LIENICWTLMDHLGYPK                 | C1193 | NP_001074785.1 | dermatan sulfate epimerase-like                                                                      | 98.0 | 99.0 |
| LLCGLLSDR                         | C81   | XP_001481126.1 | PREDICTED: similar to macrophage migration inhibitory factor isoform 2                               | 14.4 | 31.2 |
| LPCQLHQVIVAR                      | C640  | NP_033924.2    | calpain 2                                                                                            | 37.1 | 49.1 |
| LPCVAAK                           | C211  | NP_080720.1    | citrate synthase                                                                                     | 14.3 | 23.3 |
| LVVECVM*K                         | C118  | NP_077717.1    | fatty acid binding protein 4, adipocyte                                                              | 22.2 | 22.9 |
| LVVNFQCDK                         | C669  | NP_033399.1    | transglutaminase 2, C polypeptide                                                                    | 11.0 | 32.0 |
| M*TEEEVEM*LVAGHEDS<br>NGCINYEELVR | C138  | NP_034990.1    | myosin, light polypeptide 6, alkali, smooth muscle and non-muscle                                    | 11.1 | 20.3 |
| MIPSLCTHGK                        | -     | NP_032019.2    | fibrillin 1                                                                                          | 74.8 | 87.9 |
| NFHENCYR                          | C334  | NP_598515.3    | filamin binding LIM protein 1                                                                        | 26.7 | 41.0 |
| NLDSTTVAVHGEEIYCK                 | C58   | NP_031817.1    | cysteine and glycine-rich protein 1                                                                  | 18.1 | 27.3 |
| NPLSDPLYDCIFTVEGAG<br>LTK         | C619  | NP_033399.1    | transglutaminase 2, C polypeptide                                                                    | 1.4  | 11.3 |
| NTGIICTIGPASR                     | C49   | NP_035229.2    | pyruvate kinase, muscle                                                                              | 1.5  | 5.2  |
| QACILM*IK                         | C747  | NP_038635.1    | myosin, heavy polypeptide 11, smooth muscle                                                          | 9.9  | 19.0 |
| QIVSSIGLCR                        |       | NP_001025007.1 | nephronectin isoform b                                                                               | 80.1 | 84.8 |
| QVQSLTCEVDALK                     | C328  | NP_035831.2    | vimentin                                                                                             | 4.9  | 13.8 |
| SEDCFILDHGR                       | C329  | NP_666232.2    | gelsolin                                                                                             | 9.4  | 15.8 |
| SIQHCSIR                          | C119  | NP_032019.2    | fibrillin 1                                                                                          | 79.9 | 87.8 |
| SPVQCVSPELALTIALNP<br>GGRPK       | C1079 | XP_619639.3    | PREDICTED: tensin 1                                                                                  | 2.2  | 27.9 |
| SQSVRPGADVTFICTAK                 | C1265 | XP_001477365.1 | PREDICTED: similar to perlecan (heparan sulfate proteoglycan 2)                                      | 58.3 | 53.7 |
| STLTDSLCK                         | C41   | NP_031933.1    | eukaryotic translation elongation factor 2                                                           | 11.7 | 20.7 |
| TDQVCINLR                         | -     | XP_001472266.1 | PREDICTED: similar to Epidermal growth factor-containing fibulin-like extracellular matrix protein 1 | 76.3 | 83.3 |
| TFCQLILDPIFK                      | C290  | NP_031933.1    | eukaryotic translation elongation factor 2                                                           | 7.2  | 12.2 |
| TNLLQVCER                         | C985  | NP_033528.3    | vinculin                                                                                             | 6.2  | 14.1 |
| TPCEEILVK                         | C290  | NP_034357.2    | filamin, alpha                                                                                       | 15.4 | 27.9 |
| TVCAHEELLR                        | -     | NP_032572.1    | microfibril-associated glycoprotein 2                                                                | 80.1 | 87.5 |
| TVFAEHISDECK                      | C114  | XP_001477314.1 | PREDICTED: similar to ribosomal protein L3 isoform 1                                                 | 6.7  | 26.6 |
| TVYHAEVQCDGR                      | C25   | NP_031818.3    | cysteine and glycine-rich protein 2                                                                  | 28.2 | 42.6 |
| VAVPSTIHCDHLIEAQVG<br>GEK         | C126  | NP_542364.1    | aconitase 2, mitochondrial                                                                           | 4.3  | 15.4 |
| VCHLVGINVDFTR                     | C382  | NP_038635.1    | myosin, heavy polypeptide 11, smooth muscle                                                          | 17.0 | 27.1 |
| VCNPIITK                          | C603  | NP_112442.2    | heat shock protein 8                                                                                 | 3.7  | 6.3  |
| VEDMAELTCLNEASVLH<br>NLR          | C95   | NP_038635.1    | myosin, heavy polypeptide 11, smooth muscle                                                          | 5.1  | 12.7 |
| VGAFTVVCK                         | C295  | NP_034455.1    | glutamate oxaloacetate transaminase 2, mitochondrial                                                 | 14.5 | 22.7 |

|                    |       |                |                                                                                  |      |      |
|--------------------|-------|----------------|----------------------------------------------------------------------------------|------|------|
| VGELCAGK           | C313  | NP_033528.3    | vinculin                                                                         | 31.0 | 40.3 |
| VGINDFCPM*GFGVK    | C322  | NP_031568.2    | biglycan                                                                         | 21.7 | 74.3 |
| VGTECGNQK          | C574  | NP_034357.2    | filamin, alpha                                                                   | 12.4 | 27.8 |
| VGVNDFCPTVPK       | C326  | NP_079987.2    | asporin                                                                          | 28.4 | 36.6 |
| VLHDGGCSLPILR      | -     | NP_783572.2    | latent transforming growth factor beta binding protein 4 isoform a               | 71.7 | 74.4 |
| VPFLVLECPNLK       | C14   | NP_079785.1    | DC2 protein                                                                      | 6.4  | 11.1 |
| VPSGLYLGTCEER      | C1156 | NP_032331.2    | perlecan (heparan sulfate proteoglycan 2)                                        | 51.4 | 61.4 |
| VPTPNVSVVDLTCR     | C245  | XP_001473992.1 | PREDICTED: similar to Glyceraldehyde-3-phosphate dehydrogenase (GAPDH) isoform 1 | 4.4  | 11.9 |
| VSHALAEGLGVIACIGEK | C127  | NP_033441.1    | triosephosphate isomerase 1                                                      | 41.5 | 40.2 |
| VTYCPTEPGNYIINIK   | C2099 | NP_034357.2    | filamin, alpha                                                                   | 16.0 | 41.1 |
| VVQCSDLGLDK        | C62   | NP_031859.1    | decorin                                                                          | 34.6 | 45.8 |
| VVQCSDLGLK         | -     | NP_031568.2    | biglycan                                                                         | 27.5 | 36.5 |
| YGISLCQAILDETK     | C324  | NP_034860.2    | annexin A1                                                                       | 25.1 | 52.6 |
| YLIVVTDGHPLEGYKEPC | C168  | NP_034063.1    | collagen, type VI, alpha 1                                                       | 52.4 | 72.4 |
| GGLEDAVNEAK        |       |                |                                                                                  |      |      |
| YSGCLTESNLIK       | C553  | NP_033399.1    | transglutaminase 2, C polypeptide                                                | 19.2 | 33.3 |
| YTGHHAYASGCTISPY   | -     | NP_034858.2    | lysyl oxidase                                                                    | 85.1 | 88.4 |
| YVICVR             | C1715 | NP_034357.2    | filamin, alpha                                                                   | 12.0 | 34.7 |
