# Supplementary material for: Disturbed Flow Enhances Inflammatory Signaling and Atherogenesis by Increasing Thioredoxin-1 Level in Endothelial Cell Nuclei
Source: PubMed Central journal article supplement (PMC4180949; doi:10.1371/journal.pone.0108346), 2014-09-29
Supplement: pone.0108346.s002.pdf [file pone.0108346.s002.pdf]

**Table S2.** Redox ICAT/MS-measured % oxidation of peptidyl Cys/proteins of RCA and LCA in NLS-Trx1 Tg mice. The data show 193 peptidyl Cys with % oxidation (%ox) value identified from RCA and LCA of Tg mice.

| Peptide                        | Cys   | Accession      | Annotation                                                         | %ox<br>RCA | %ox<br>LCA |
|--------------------------------|-------|----------------|--------------------------------------------------------------------|------------|------------|
| ACPVGHHLHR                     | C864  | NP_783572.2    | latent transforming growth factor beta binding protein 4 isoform a | 60.8       | 85.2       |
| AEGSDVANAVLDGADCIM*LS<br>GETAK | C358  | NP_035229.2    | pyruvate kinase, muscle                                            | 16.1       | 23.1       |
| AETFTFHSDICTLPEK               | -     | NP_033784.2    | albumin                                                            | 73.0       | 87.8       |
| AGLSSGFVGCVR                   | C3248 | XP_001477365.1 | PREDICTED: similar to perlecan (heparan sulfate proteoglycan 2)    | 39.0       | 68.2       |
| AHEPTYFTVDCTEAGQGDSI<br>GIK    | C796  | NP_034357.2    | filamin, alpha                                                     | 42.8       | 20.1       |
| AHGQDLGTAGSCLR                 | C1493 | NP_034061.2    | collagen, type IV, alpha 1                                         | 59.8       | 75.2       |
| AHNQDLGLAGSCLAR                | C1532 | NP_034062.2    | procollagen, type IV, alpha 2                                      | 47.6       | 77.9       |
| AHSVEECR                       | C888  | XP_001477365.1 | PREDICTED: similar to perlecan (heparan sulfate proteoglycan 2)    | 6.4        | 5.1        |
| AHVAPCFDASK                    | C1157 | NP_034357.2    | filamin, alpha                                                     | 14.4       | 22.6       |
| ALANSLACQ GK                   | C339  | NP_031464.1    | aldolase 1, A isoform                                              | 17.4       | 27.9       |
| ALIQCAK                        | C950  | NP_033528.3    | vinculin                                                           | 20.6       | 30.0       |
| APSVANIGSHCDLSLK               | C2152 | NP_034357.2    | filamin, alpha                                                     | 13.9       | 29.4       |
| ASPFIECHGR                     | C1615 | NP_031760.2    | procollagen, type IV, alpha 3                                      | 69.6       | 83.8       |
| AVIFCLSADK                     | C39   | NP_062745.1    | destrin                                                            | 39.4       | 58.6       |
| AVLFCLSEDK                     | C39   | XP_001480334.1 | PREDICTED: similar to Cofilin-1 (Cofilin, non-muscle isoform)      | 17.9       | 47.9       |
| CAELEEEELK                     | C190  | NP_077745.2    | tropomyosin 1, alpha                                               | 5.3        | 33.0       |
| CAPGVVGPTTEADIDFDIIR           | C810  | NP_034357.2    | filamin, alpha                                                     | 1.4        | 41.7       |
| CATSTPAFFAEK                   | C270  | NP_034860.2    | annexin A1                                                         | 19.4       | 33.8       |
| CAVVDVPFGGAK                   | C172  | NP_032159.1    | glutamate dehydrogenase 1                                          | 16.4       | 26.2       |
| CDIDIR                         | C333  | NP_113581.1    | actin-like 6B                                                      | 21.5       | 43.9       |
| CDKEVYFAER                     | C7    | NP_031789.1    | cysteine-rich protein 1 (intestinal)                               | 37.9       | 55.8       |
| CDLEIQANGR                     | C10   | NP_033399.1    | transglutaminase 2, C polypeptide                                  | 8.3        | 6.1        |
| CDRVDQLTAQLADLAAR              | C545  | NP_033528.3    | vinculin                                                           | 28.5       | 83.4       |
| CDSGFALDSEER                   | C1057 | NP_032019.2    | fibrillin 1                                                        | 51.4       | 79.6       |
| CDVDIR                         | C286  | NP_780706.1    | actin, beta-like 2                                                 | 21.4       | 45.5       |
| CGSGIVGAVVK                    | C249  | NP_058078.1    | PDZ and LIM domain 3                                               | 28.8       | 51.4       |
| CGTGIVGVFVK                    | C261  | NP_058557.2    | carboxyl terminal LIM domain protein 1                             | 36.8       | 52.9       |
| CIESLIAVFQK                    | C8    | NP_058020.1    | S100 calcium binding protein A11 (calizzarin)                      | 3.1        | 15.4       |
| CIIPNHEKR                      | C678  | NP_780469.1    | myosin heavy chain 10, non-muscle                                  | 3.2        | 13.4       |
| CILLSNLSNTSHAPK                | C1464 | NP_032014.3    | fatty acid synthase                                                | 11.3       | 31.6       |
| CLDAFPNLR                      | C174  | NP_034489.1    | glutathione S-transferase, mu 3                                    | 14.3       | 18.9       |

|                                  |           |                |                                                                |      |      |
|----------------------------------|-----------|----------------|----------------------------------------------------------------|------|------|
| CLELFSELAEDK                     | C412      | NP_032328.2    | heat shock protein 1, beta                                     | 63.3 | 26.9 |
| CLGIPTR                          | C290      | NP_033399.1    | transglutaminase 2, C polypeptide                              | 12.5 | 12.3 |
| CLHPLASETFVSK                    | C71       | NP_034341.2    | four and a half LIM domains 1 isoform 3                        | 19.9 | 45.1 |
| CLIEILASR                        | C111      | NP_036052.2    | annexin A10                                                    | 4.5  | 0.9  |
| CNGVLEGIR                        | C694      | NP_071855.2    | myosin, heavy polypeptide 9, non-muscle isoform 1              | 22.6 | 37.7 |
| CPETLFQPSFIGMESAGIHETT<br>YNSIMK | C259      | NP_033738.1    | actin, alpha, cardiac                                          | 12.3 | 26.8 |
| CQLEINFNTLQTK                    | C352      | NP_068695.1    | actinin alpha 4                                                | 9.8  | 35.0 |
| CSGPGLER                         | C1165     | NP_034357.2    | filamin, alpha                                                 | 15.7 | 42.0 |
| CSGPGLSPGM*VR                    | C1453     | NP_034357.2    | filamin, alpha                                                 | 17.1 | 29.1 |
| CSLCGEESFGTGS DHLR               | C340;C343 | XP_001477201.1 | PREDICTED: hypothetical protein                                | 5.9  | 35.3 |
| CSPDPGLTALLSDHR                  | C255      | NP_059067.2    | hemopexin                                                      | 45.0 | 71.6 |
| CSQAVYAAEK                       | C122      | NP_031817.1    | cysteine and glycine-rich protein 1                            | 37.3 | 59.8 |
| CSVNLANK                         | C255      | NP_034341.2    | four and a half LIM domains 1 isoform 3                        | 25.1 | 44.9 |
| CSYDEHAK                         | C58       | NP_033784.2    | albumin                                                        | 25.1 | 47.3 |
| CSYQPTMEGVHTVHVTFAGVP<br>IPR     | C444      | NP_034357.2    | filamin, alpha                                                 | 15.1 | 29.3 |
| CVSTLLDLIQTK                     | C391      | NP_082191.1    | adaptor-related protein complex 2, beta 1 subunit isoform b    | 9.6  | 27.3 |
| CAPGVVGPTAADIDFDIIR              | C810      | NP_034357.2    | filamin, alpha                                                 | 10.9 | 41.7 |
| CECFPGLAVGLDGR                   | C639;C641 | NP_032019.2    | fibrillin 1                                                    | 52.4 | 76.7 |
| CFELQALLEEER                     | C516      | NP_114397.3    | sarcolemma associated protein                                  | 17.9 | 18.7 |
| CGEVVQEHVIR                      | C248      | NP_598515.3    | filamin binding LIM protein 1                                  | 32.5 | 62.5 |
| CIVVEEGK                         |           | NP_062745.1    | destrin                                                        | 26.3 | 44.3 |
| CNEGYEVAPDGR                     | C1960     | NP_032019.2    | fibrillin 1                                                    | 45.1 | 83.7 |
| CNIHYTGR                         |           | NP_034859.2    | lysyl oxidase-like 1                                           | 97.5 | 93.9 |
| CQCHLR                           | C53;C55   | NP_031859.1    | decorin                                                        | 22.9 | 64.0 |
| CYEM*ASHLR                       | C128      | NP_035202.1    | profilin 1                                                     | 22.2 | 36.4 |
| DAFCVFEQNQGLPLR                  | C430      | NP_033805.1    | amine oxidase, copper containing 3                             | 42.3 | 57.0 |
| DFASCHLAQAPNHVVVSR               | -         | NP_598738.1    | transferrin                                                    | 45.7 | 79.0 |
| DGIILCEFINK                      | C61       | NP_034052.2    | calponin 1                                                     | 1.1  | 28.6 |
| DGLGFCALIHR                      | C180      | NP_598917.1    | actinin, alpha 1                                               | 15.1 | 21.2 |
| DGSASGTTLLEALDCILPPTRP<br>TDKPLR | C234      | NP_034236.2    | eukaryotic translation elongation factor 1 alpha 1             | 14.1 | 19.7 |
| DICNDVLSLLEK                     | C94       | XP_001477753.1 | PREDICTED: similar to 14-3-3 zeta                              | 28.8 | 36.4 |
| DLAGCIHGLSNVK                    | C418      | NP_766599.1    | isocitrate dehydrogenase 2 (NADP+), mitochondrial              | 21.6 | 23.6 |
| DQGPNCALQQILGTK                  | C46       | NP_056599.1    | periostin, osteoblast specific factor                          | 16.6 | 52.6 |
| DSNNLCLHFNPR                     | C43       | NP_032521.1    | lectin, galactose binding, soluble 1                           | 22.7 | 44.7 |
| DVPLGAPLCIIVEK                   | C290      | NP_663589.2    | dihydrolipoamide S-acetyltransferase (E2 component of pyruvate | 7.4  | 36.0 |

|                                |           |                |                                                                                             |      |      |
|--------------------------------|-----------|----------------|---------------------------------------------------------------------------------------------|------|------|
|                                |           |                | dehydrogenase complex)                                                                      |      |      |
| EDQSILCTGESGAGK                | C172      | NP_071855.2    | myosin, heavy polypeptide 9, non-muscle isoform 1                                           | 5.5  | 23.3 |
| EEIVYLPCIYR                    | C31       | NP_033176.2    | selenium binding protein 1                                                                  | 12.0 | 34.8 |
| EFNGLGDCLTK                    | C160      | NP_031476.3    | solute carrier family 25 (mitochondrial carrier, adenine nucleotide translocator), member 4 | 9.5  | 16.0 |
| EIVHIQAGQCGNQIGAK              | C12       | NP_075768.1    | tubulin, beta 3                                                                             | 14.7 | 23.6 |
| EKPYPFIPEDCTFIQNVPLEDR         | C449      | NP_058085.2    | heterogeneous nuclear ribonucleoprotein U                                                   | 14.2 | 23.4 |
| ELETVCNDVLALLDK                | C97       | NP_035868.1    | tyrosine 3-monooxygenase/tryptophan 5-monooxygenase activation protein, eta polypeptide     | 37.1 | 32.6 |
| ELGSPPGISLETIDAAFSCPGS SR      | C364      | NP_059067.2    | hemopexin                                                                                   | 45.6 | 59.6 |
| EPCGGLEDAVNEAK                 | C168      | NP_034063.1    | collagen, type VI, alpha 1                                                                  | 58.2 | 89.7 |
| ESNPALGIDCLHK                  | C493      | NP_031663.1    | chaperonin subunit 5 (epsilon)                                                              | 16.6 | 30.0 |
| EVESVTPEHCIFASNTSALPIN QIAAVSK | C470      | NP_849209.1    | mitochondrial trifunctional protein, alpha subunit                                          | 9.5  | 23.5 |
| EYEELCPR                       | C1010     | NP_032019.2    | fibrillin 1                                                                                 | 50.0 | 77.8 |
| EYLPIGGLAEFCK                  | C106      | NP_034455.1    | glutamate oxaloacetate transaminase 2, mitochondrial                                        | 8.1  | 10.9 |
| FCTGLTQIETLFK                  | C254      | NP_067248.1    | creatine kinase, brain                                                                      | 4.8  | 9.9  |
| FEELCSDLFR                     | C306      | NP_034608.2    | heat shock 70kDa protein 1B                                                                 | 17.6 | 37.1 |
| FGEVVDCTIK                     | C104      | NP_001041526.1 | heterogeneous nuclear ribonucleoprotein A/B isoform 1                                       | 29.3 | 23.6 |
| FM*TVLCTR                      | C546      | NP_001103681.1 | annexin A6 isoform b                                                                        | 21.0 | 39.3 |
| FNAHGDANTIVCNTK                | C61       | NP_032521.1    | lectin, galactose binding, soluble 1                                                        | 19.7 | 42.1 |
| FNAILCSR                       | C180      | XP_001473013.1 | PREDICTED: similar to Annexin A11                                                           | 16.1 | 27.9 |
| FTFEEAEAECTSR                  | C270      | NP_001074718.1 | versican                                                                                    | 43.9 | 66.9 |
| FTPAVCGLR                      | -         | NP_001107021.1 | latent transforming growth factor beta binding protein 4 isoform b                          | 74.5 | 90.3 |
| FVFHNEQVYCPDCAK                | C273;C276 | NP_034341.2    | four and a half LIM domains 1 isoform 3                                                     | 23.1 | 43.7 |
| GAGTDEGCLIEILASR               | C108      | NP_038499.2    | annexin A4                                                                                  | 24.8 | 20.0 |
| GAPLVVICQGK                    | C448      | NP_033494.1    | dihydropyrimidinase-like 3                                                                  | 17.2 | 34.8 |
| GCDVVVIPAGVPR                  | C93       | NP_032643.2    | malate dehydrogenase 2, NAD (mitochondrial)                                                 | 13.1 | 30.5 |
| GCTFLVGLIQK                    | C405      | NP_033924.2    | calpain 2                                                                                   | 16.6 | 17.4 |
| GEDFYCVTCHETK                  | C150;C153 | NP_034341.2    | four and a half LIM domains 1 isoform 3                                                     | 19.7 | 56.0 |
| GFGTDEQAIIDCLGSR               | C224      | NP_038497.2    | annexin A11                                                                                 | 22.0 | 27.7 |
| GFQFVSSSLPDICYR                | -         | NP_001103215.1 | cellular nucleic acid binding protein isoform 2                                             | 51.2 | 69.3 |
| GHFFVEDQIYCEK                  | C305      | NP_058557.2    | carboxyl terminal LIM domain protein 1                                                      | 24.2 | 32.9 |
| GIFPVLCK                       | C474      | NP_035229.2    | pyruvate kinase, muscle                                                                     | 5.5  | 3.7  |

|                             |       |                |                                                                                                                                                                          |      |      |
|-----------------------------|-------|----------------|--------------------------------------------------------------------------------------------------------------------------------------------------------------------------|------|------|
| GLGTDEDSLIEIICSR            | C133  | XP_001474833.1 | PREDICTED: similar to Annexin A2 (Annexin II) (Lipocortin II) (Calpactin I heavy chain) (Chromobindin-8) (p36) (Protein I) (Placental anticoagulant protein IV) (PAP-IV) | 9.2  | 28.0 |
| GQCVKPLFGAVTK               | C672  | NP_032019.2    | fibrillin 1                                                                                                                                                              | 66.4 | 87.4 |
| GSHCSGSGDPAEYNLR            | C572  | NP_001002011.2 | lamin A isoform A                                                                                                                                                        | 4.7  | 26.7 |
| GSLGTSGETCR                 | C892  | NP_032331.2    | perlecan (heparan sulfate proteoglycan 2)                                                                                                                                | 24.0 | 69.1 |
| GTFASLSELHCDK               | C94   | NP_058652.1    | hemoglobin, beta adult minor chain                                                                                                                                       | 11.9 | 26.4 |
| GVLFGVPGAFTPGCSK            | C96   | NP_036151.1    | peroxiredoxin 5 precursor                                                                                                                                                | 18.0 | 33.8 |
| GVVNFVAVITDGHVTGSPCGG<br>IK | C185  | NP_666119.1    | collagen, type VI, alpha 2                                                                                                                                               | 49.2 | 70.7 |
| HDLDLICR                    | C245  | NP_114074.1    | protein phosphatase 1, catalytic subunit, alpha                                                                                                                          | 10.2 | 23.9 |
| HEQNIDCGGGYVK               | C105  | NP_031617.1    | calreticulin                                                                                                                                                             | 26.6 | 27.7 |
| HFCPNVPIILVGNK              | C107  | NP_031510.2    | ras homolog gene family, member C                                                                                                                                        | 16.0 | 15.3 |
| HGCTVLTALGTILK              | C67   | NP_038621.2    | myoglobin                                                                                                                                                                | 18.9 | 20.8 |
| HHCPNTPIILVGTK              | C105  | NP_033033.1    | RAS-related C3 botulinum substrate 1                                                                                                                                     | 5.6  | 8.6  |
| HPNSFICKL                   | C288  | NP_032786.1    | osteoglycin                                                                                                                                                              | 30.1 | 47.3 |
| HSQTTDDPLCPPGTK             |       | NP_034061.2    | collagen, type IV, alpha 1                                                                                                                                               | 21.6 | 29.7 |
| IDQLECDHQLIQEALIFDNK        | C690  | NP_598917.1    | actinin, alpha 1                                                                                                                                                         | 25.5 | 10.0 |
| IIPGFMCQGGDFTR              | C62   | XP_001002180.2 | PREDICTED: hypothetical protein                                                                                                                                          | 10.5 | 22.3 |
| ILYSQCGDVM*R                | C32   | NP_034990.1    | myosin, light polypeptide 6, alkali, smooth muscle and non-muscle                                                                                                        | 10.3 | 35.6 |
| IQLEHHISPGDFPDCQK           | C356  | NP_694708.2    | EH-domain containing 2                                                                                                                                                   | 4.6  | 10.1 |
| ISLGLPVGAVINCADNTGAK        | C28   | NP_075029.1    | ribosomal protein L23                                                                                                                                                    | 12.7 | 22.8 |
| IVSPSGAAVPCK                | C1018 | NP_034357.2    | filamin, alpha                                                                                                                                                           | 9.0  | 19.6 |
| KITISDCGQL                  | C161  | XP_001002180.2 | PREDICTED: hypothetical protein                                                                                                                                          | 18.1 | 41.2 |
| KPVDQYEDCYLAR               | C260  | NP_598738.1    | transferrin                                                                                                                                                              | 54.9 | 78.4 |
| KQELEEICHDLER               | C917  | NP_071855.2    | myosin, heavy polypeptide 9, non-muscle isoform 1                                                                                                                        | 16.9 | 31.5 |
| KTYITDPVSAPCAPPLQPK         | C365  | NP_848780.2    | LIM domain containing preferred translocation partner in lipoma                                                                                                          | 8.8  | 16.1 |
| LCYVALDFENEMATAASSSSL<br>EK | C219  | NP_033738.1    | actin, alpha, cardiac                                                                                                                                                    | 13.4 | 37.3 |
| LFACSNR                     | C670  | NP_666232.2    | gelsolin                                                                                                                                                                 | 14.7 | 26.9 |
| LFDSICNNK                   | C106  | XP_001475135.1 | PREDICTED: similar to Guanine nucleotide-binding protein G(i), alpha-2 subunit (Adenylate cyclase-inhibiting G alpha protein)                                            | 18.6 | 21.7 |
| LFQEEFPGIPYPPDAAVECHR       | C148  | NP_059067.2    | hemopexin                                                                                                                                                                | 22.2 | 68.4 |
| LLCGLLSDR                   | C81   | XP_001481126.1 | PREDICTED: similar to macrophage migration inhibitory factor isoform 2                                                                                                   | 11.6 | 41.7 |

|                             |       |                |                                                                    |      |      |
|-----------------------------|-------|----------------|--------------------------------------------------------------------|------|------|
| LPAIEPSDQGQYLRCR            | C1405 | XP_001477365.1 | PREDICTED: similar to perlecan (heparan sulfate proteoglycan 2)    | 51.5 | 74.9 |
| LPCVAAK                     | C211  | NP_080720.1    | citrate synthase                                                   | 17.6 | 24.5 |
| LPCVEDYLSAILNR              | -     | NP_033784.2    | albumin                                                            | 82.9 | 94.6 |
| LPVVIGLLDVDCESEVVIK         | C824  | NP_001003908.1 | clathrin, heavy polypeptide (Hc)                                   | 14.6 | 20.1 |
| LQVEPAVDTSGVQCYPGPIEG QGVFR | C1260 | NP_034357.2    | filamin, alpha                                                     | 12.2 | 22.5 |
| LTLVCSTAPGPLELDLTGDLES FKK  | C79   | NP_598557.3    | Rho GDP dissociation inhibitor (GDI) alpha                         | 17.3 | 30.0 |
| LTTPTYGDLNHLVSATMSGVT TCLR  | C238  | XP_001473173.1 | PREDICTED: similar to Tubulin, beta 4                              | 17.0 | 25.5 |
| LVQCVDAFEK                  | C1555 | NP_647461.3    | myosin, light polypeptide kinase                                   | 20.8 | 29.4 |
| LVVECVM*K                   | C118  | NP_077717.1    | fatty acid binding protein 4, adipocyte                            | 20.2 | 42.1 |
| LVVNFQCDK                   | C669  | NP_033399.1    | transglutaminase 2, C polypeptide                                  | 15.5 | 31.8 |
| M*IPSLCTHGK                 | C1041 | NP_032019.2    | fibrillin 1                                                        | 97.7 | 99.3 |
| NECFLQHK                    | C125  | NP_033784.2    | albumin                                                            | 73.5 | 83.3 |
| NECLEAGALFQDPSFPALPSS LGYK  | C39   | NP_033924.2    | calpain 2                                                          | 19.8 | 20.8 |
| NLDSTTVAIHDEEIIYCK          | C58   | NP_031818.3    | cysteine and glycine-rich protein 2                                | 26.7 | 49.9 |
| NLDSTTVAVHGEEIIYCK          | C58   | NP_031817.1    | cysteine and glycine-rich protein 1                                | 8.2  | 44.1 |
| NPLSDPLYDCIFTVEGAGLTK       | C619  | NP_033399.1    | transglutaminase 2, C polypeptide                                  | 13.1 | 1.3  |
| NSFTVDCSK                   | C2661 | NP_001074654.1 | filamin C, gamma                                                   | 6.1  | 30.8 |
| NTGIICTIGPASR               | C49   | NP_035229.2    | pyruvate kinase, muscle                                            | 5.7  | 11.5 |
| QIVSSIGLCR                  |       | NP_001025007.1 | nephronectin isoform b                                             | 75.4 | 93.3 |
| QVQSLTCEVDALK               | C328  | NP_035831.2    | vimentin                                                           | 3.4  | 20.2 |
| SEDCFILDHGR                 | C329  | NP_666232.2    | gelsolin                                                           | 9.7  | 28.1 |
| SFLIEIQCISR                 | C143  | NP_031642.1    | caveolin, caveolae protein 1                                       | 19.7 | 26.1 |
| SGNCYLDIRPR                 | C1536 | NP_032019.2    | fibrillin 1                                                        | 52.0 | 88.5 |
| SICTTVLELLDK                | C136  | XP_001473550.1 | PREDICTED: similar to Ywhaq protein                                | 31.9 | 40.3 |
| SKEEAFDAICQLIAGK            | C100  | NP_080757.1    | tubulin polymerization-promoting protein family member 3           | 23.0 | 33.2 |
| SPVQCVSPELALTIALNPGGRP K    | C1079 | XP_619639.3    | PREDICTED: tensin 1                                                | 13.7 | 25.1 |
| SQSVRPGADVTFICTAK           | C1265 | XP_001477365.1 | PREDICTED: similar to perlecan (heparan sulfate proteoglycan 2)    | 46.0 | 86.1 |
| SSCISQHVISEAK               | C395  | NP_783572.2    | latent transforming growth factor beta binding protein 4 isoform a | 50.5 | 74.9 |
| STAISCIGAYR                 | -     | NP_001035516.1 | thrombospondin, type I, domain containing 4 isoform a              | 86.8 | 94.5 |
| STLTDSLVCCK                 | C41   | NP_031933.1    | eukaryotic translation elongation factor 2                         | 10.2 | 33.5 |
| TCDLLASFK                   | C102  | NP_033280.1    | serine (or cysteine) proteinase inhibitor, clade B, member 6a      | 18.1 | 25.3 |

|                                    |       |                |                                                                                                      |      |      |
|------------------------------------|-------|----------------|------------------------------------------------------------------------------------------------------|------|------|
| TDQVCINLR                          | -     | XP_001472266.1 | PREDICTED: similar to Epidermal growth factor-containing fibulin-like extracellular matrix protein 1 | 71.8 | 97.9 |
| TECGLLGFTDLK                       | C538  | NP_998781.1    | plasma membrane calcium ATPase 4                                                                     | 16.8 | 21.0 |
| TFCQLILDPIFK                       | C290  | NP_031933.1    | eukaryotic translation elongation factor 2                                                           | 4.6  | 22.4 |
| TFYSCTTEGR                         | -     | NP_034363.1    | fibronectin 1                                                                                        | 73.1 | 89.8 |
| TICIETIK                           | C847  | NP_032019.2    | fibrillin 1                                                                                          | 53.1 | 83.2 |
| TIPLISQCTPK                        | C212  | NP_032643.2    | malate dehydrogenase 2, NAD (mitochondrial)                                                          | 11.4 | 34.2 |
| TLTGTVIDSGDGVTHVIPVAEG<br>YVIGSCIK | C189  | NP_076224.1    | ARP3 actin-related protein 3 homolog                                                                 | 17.7 | 25.2 |
| TNLLQVCER                          | C985  | NP_033528.3    | vinculin                                                                                             | 16.0 | 19.7 |
| TPCEEILVK                          | C2593 | NP_034357.2    | filamin, alpha                                                                                       | 5.6  | 0.8  |
| TVYFAEEVQCEGNSFHK                  | C25   | NP_031817.1    | cysteine and glycine-rich protein 1                                                                  | 26.8 | 51.3 |
| TVYHAEVQCDGR                       | C25   | NP_031818.3    | cysteine and glycine-rich protein 2                                                                  | 31.3 | 56.9 |
| VACITEQVLTLVNK                     | C478  | NP_598694.2    | ribophorin I                                                                                         | 10.6 | 15.3 |
| VCNPIITK                           | C603  | NP_112442.2    | heat shock protein 8                                                                                 | 10.1 | 6.4  |
| VCRTWLYNLK                         | C1217 | XP_001481380.1 | PREDICTED: doublecortin domain containing 5                                                          | 6.2  | 2.6  |
| VDINTEDLEDGTCR                     | C2094 | NP_034357.2    | filamin, alpha                                                                                       | 26.3 | 49.8 |
| VGEATETALTCLVEK                    | C447  | NP_001103610.1 | ATPase, Ca <sup>++</sup> transporting, cardiac muscle, slow twitch 2 isoform a                       | 15.3 | 25.5 |
| VGINDFCPMGFVK                      | C322  | NP_031568.2    | biglycan                                                                                             | 40.9 | 45.7 |
| VGTECGNQK                          | C574  | NP_034357.2    | filamin, alpha                                                                                       | 12.4 | 31.8 |
| GVNDFCPTVPK                        | C326  | NP_079987.2    | asporin                                                                                              | 17.7 | 51.6 |
| VHSPSGALEECYVTEIDQDK               | C2370 | NP_034357.2    | filamin, alpha                                                                                       | 27.8 | 53.7 |
| VIHLQFNSISLTDFTFCK                 | C255  | NP_032786.1    | osteoglycin                                                                                          | 18.9 | 55.6 |
| VLHDGGCSLPILR                      | -     | NP_783572.2    | latent transforming growth factor beta binding protein 4 isoform a                                   | 62.6 | 96.4 |
| VPFLVLECPNLK                       | C14   | NP_079785.1    | DC2 protein                                                                                          | 9.6  | 15.8 |
| VPSGLYLGTCTER                      | C1156 | NP_032331.2    | perlecan (heparan sulfate proteoglycan 2)                                                            | 54.3 | 89.9 |
| VPTPNVSVVDLTCR                     | C245  | XP_001473992.1 | PREDICTED: similar to Glyceraldehyde-3-phosphate dehydrogenase (GAPDH) isoform 1                     | 14.3 | 25.9 |
| VQELGHGCSALVTK                     | C1927 | NP_035732.1    | talin 1                                                                                              | 18.2 | 28.6 |
| VQVQDNEGCSVEATVK                   |       | NP_034357.2    | filamin, alpha                                                                                       | 16.3 | 94.7 |
| VSCLEIPGPHGPK                      |       | NP_666119.1    | collagen, type VI, alpha 2                                                                           | 70.0 | 84.6 |
| VSHALAEGLGVIACIGEK                 | C127  | NP_033441.1    | triosephosphate isomerase 1                                                                          | 10.1 | 37.8 |
| VTYCPTEPGNYIINIK                   | C2099 | NP_034357.2    | filamin, alpha                                                                                       | 11.1 | 61.9 |
| VVQCSDLGLDK                        | C62   | NP_031859.1    | decorin                                                                                              | 31.3 | 53.9 |
| VVQCSDLGLK                         | C77   | NP_031568.2    | biglycan                                                                                             | 13.1 | 49.3 |
| YFLVGAGAIGCELLK                    | C539  | XP_001474649.1 | PREDICTED: similar to ubiquitin activating enzyme E1                                                 | 9.0  | 27.6 |

|                  |       |             |                                      |      |      |
|------------------|-------|-------------|--------------------------------------|------|------|
| YGISLCQAILDETK   | C324  | NP_034860.2 | annexin A1                           | 24.3 | 21.1 |
| YSGCLTESNLIK     | C553  | NP_033399.1 | transglutaminase 2, C<br>polypeptide | 21.3 | 32.3 |
| YTGHHAYASGCTISPY | -     | NP_034858.2 | lysyl oxidase                        | 72.7 | 89.1 |
| YVICVR           | C1715 | NP_034357.2 | filamin, alpha                       | 26.1 | 24.3 |
