# Supplementary material for: Disturbed Flow Enhances Inflammatory Signaling and Atherogenesis by Increasing Thioredoxin-1 Level in Endothelial Cell Nuclei
Source: PubMed Central journal article supplement (PMC4180949; doi:10.1371/journal.pone.0108346), 2014-09-29
Supplement: pone.0108346.s003.pdf [file pone.0108346.s003.pdf]

**Table S3.** Redox ICAT/MS-measured % oxidation of peptidyl Cys/proteins of LCA in WT and Tg mice. The data show 156 peptidyl Cys with % oxidation (%ox) value identified from LCA of WT and Tg mice.

| Peptide                 | Cys   | Accession          | Annotation                                                         | %ox<br>WT | %ox<br>Tg |
|-------------------------|-------|--------------------|--------------------------------------------------------------------|-----------|-----------|
| ACPVGHHLHR              | C864  | NP_783572.2        | latent transforming growth factor beta binding protein 4 isoform a | 67.6      | 85.2      |
| AGLSSGFVGCVR            | C3248 | XP_00147736<br>5.1 | PREDICTED: similar to perlecan (heparan sulfate proteoglycan 2)    | 46.8      | 68.2      |
| AHGQDLGTAGSCLR          | C1493 | NP_034061.2        | collagen, type IV, alpha 1                                         | 75.1      | 75.2      |
| AHNQDLGLAGSCLAR         | C1532 | NP_034062.2        | procollagen, type IV, alpha 2                                      | 67.1      | 86.0      |
| AHSVVEECR               | C888  | XP_00147736<br>5.1 | PREDICTED: similar to perlecan (heparan sulfate proteoglycan 2)    | 88.5      | 5.1       |
| AHVAPCFDASK             | C1157 | NP_034357.2        | filamin, alpha                                                     | 29.2      | 22.6      |
| ALANSLACQGK             | C339  | NP_031464.1        | aldolase 1, A isoform                                              | 23.9      | 27.9      |
| ALEVEECR                | C1530 | NP_032331.2        | perlecan (heparan sulfate proteoglycan 2)                          | 45.3      | 76.6      |
| ALIQCAK                 | C950  | NP_033528.3        | vinculin                                                           | 32.0      | 30.0      |
| APSVANIGSHCDLSLK        | C2152 | NP_034357.2        | filamin, alpha                                                     | 26.7      | 29.4      |
| ASPFIECHGR              | C1615 | NP_031760.2        | procollagen, type IV, alpha 3                                      | 82.8      | 83.8      |
| AVIFCLSADK              | C39   | NP_062745.1        | destrin                                                            | 58.5      | 58.6      |
| CAELEEEELK              | C190  | NP_077745.2        | tropomyosin 1, alpha                                               | 7.6       | 33.0      |
| CAPGVVGPTEADIDFD<br>IIR | C810  | NP_034357.2        | filamin, alpha                                                     | 40.4      | 41.7      |
| CATSTPAFFAEK            | C270  | NP_034860.2        | annexin A1                                                         | 32.4      | 33.8      |
| CAVVDVPFGGAK            | C172  | NP_032159.1        | glutamate dehydrogenase 1                                          | 35.3      | 26.2      |
| CDIDIR                  | C333  | NP_113581.1        | actin-like 6B                                                      | 37.9      | 43.9      |
| CDKEVYFAER              | C7    | NP_031789.1        | cysteine-rich protein 1 (intestinal)                               | 42.4      | 55.8      |
| CDRVDQLTAQLADLA<br>AR   | C545  | NP_033528.3        | vinculin                                                           | 32.1      | 83.4      |
| CDSGFALDSEER            | C1057 | NP_032019.2        | fibrillin 1                                                        | 68.1      | 79.6      |
| CDVDIR                  | C286  | NP_780706.1        | actin, beta-like 2                                                 | 40.5      | 45.5      |
| CEKPFLGHR               | C227  | NP_659111.1        | LIM and senescent cell antigen like domains 2                      | 38.9      | 47.0      |
| CGTGIVGVFVK             | C261  | NP_058557.2        | carboxyl terminal LIM domain protein 1                             | 29.5      | 52.9      |
| CIESLIAVFQK             | C8    | NP_058020.1        | S100 calcium binding protein A11 (calizzarin)                      | 12.0      | 15.4      |
| CIIPNHEK                | C671  | NP_071855.2        | myosin, heavy polypeptide 9, non-muscle isoform 1                  | 0.5       | 18.8      |
| CIIPNHEKR               | C678  | NP_780469.1        | myosin heavy chain 10, non-muscle                                  | 18.3      | 13.4      |
| CILLSNLSNTSHAPK         | C1464 | NP_032014.3        | fatty acid synthase                                                | 27.0      | 31.6      |
| CLGIPTR                 | C290  | NP_033399.1        | transglutaminase 2, C polypeptide                                  | 9.1       | 12.3      |
| CLHPLASETFVSK           | C71   | NP_034341.2        | four and a half LIM domains 1 isoform 3                            | 32.0      | 45.1      |
| CNGVLEGIR               | C694  | NP_071855.2        | myosin, heavy polypeptide 9, non-muscle isoform 1                  | 30.0      | 37.7      |
| CQLEINFNTLQTK           | C352  | NP_068695.1        | actinin alpha 4                                                    | 32.9      | 35.0      |
| CSGPGLSPGM*VR           | C1453 | NP_034357.2        | filamin, alpha                                                     | 28.2      | 29.1      |
| CSPDPGLTALLSDHR         | C255  | NP_059067.2        | hemopexin                                                          | 66.6      | 71.6      |
| CSVNLANK                | C255  | NP_034341.2        | four and a half LIM domains 1 isoform 3                            | 33.9      | 44.9      |
| CSYDEHAK                | C58   | NP_033784.2        | albumin                                                            | 36.9      | 47.3      |

|                                          |        |                    |                                                                                                |      |      |
|------------------------------------------|--------|--------------------|------------------------------------------------------------------------------------------------|------|------|
| CSYQPTM*EGVHTVH<br>VTFAGVPIPR<br>CVNLIQK | C444   | NP_034357.2        | filamin, alpha                                                                                 | 28.1 | 23.9 |
| CVSTLLDLIQTK                             | C1173  | NP_032019.2        | fibrillin 1                                                                                    | 79.7 | 89.5 |
| CAPGVVGPTADIDFD<br>IIR                   | C391   | NP_082191.1        | adaptor-related protein complex 2, beta 1<br>subunit isoform b                                 | 25.4 | 27.3 |
| CFELQALLEEER                             | C810   | NP_034357.2        | filamin, alpha                                                                                 | 36.1 | 41.7 |
| CGDSVYAAEK                               | C516   | NP_114397.3        | sarcolemma associated protein                                                                  | 36.4 | 18.7 |
| CGEVVQEHVIR                              | C122   | NP_031818.3        | cysteine and glycine-rich protein 2                                                            | 28.8 | 40.6 |
| CIVVEEGK                                 | C248   | NP_598515.3        | filamin binding LIM protein 1                                                                  | 48.1 | 62.5 |
| CKPGFFGDATK                              | -      | NP_062745.1        | destrin                                                                                        | 45.8 | 44.3 |
| CLHPLASETFVSK                            | -      | NP_032331.2        | perlecan (heparan sulfate proteoglycan 2)                                                      | 65.7 | 93.9 |
| CLIEILASR                                | C71    | NP_034341.2        | four and a half LIM domains 1 isoform 3                                                        | 32.0 | 45.1 |
| CNEGYEVAPDGR                             | C111   | NP_036052.2        | annexin A10                                                                                    | 25.4 | 20.8 |
| CNIHYTGR                                 | C1960  | NP_032019.2        | fibrillin 1                                                                                    | 58.5 | 83.7 |
| CPETLFQPSFIGM*ES<br>AGIHETTYNSIM*K       | -      | NP_034859.2        | lysyl oxidase-like 1                                                                           | 96.5 | 93.9 |
| CSNNGLVAGFQSR                            | C259   | NP_033738.1        | actin, alpha, cardiac                                                                          | 34.0 | 30.5 |
| CYEM*ASHLR                               | -      | NP_062733.1        | dermatopontin                                                                                  | 73.4 | 90.3 |
| DAFCVFEQNQGLPLR                          | C128   | NP_035202.1        | profilin 1                                                                                     | 39.7 | 36.4 |
| DFHVHCYR                                 | C430   | NP_033805.1        | amine oxidase, copper containing 3                                                             | 57.6 | 57.0 |
| DGILCEFINK                               | C567   | NP_848780.2        | LIM domain containing preferred<br>translocation partner in lipoma<br>calponin 1               | 33.2 | 45.6 |
| DGLGFCALIHR                              | C61    | NP_034052.2        | calponin 1                                                                                     | 31.9 | 28.6 |
| DGSASGTTLLEALDCI<br>LPPTRPTDKPLR         | C180   | NP_598917.1        | actinin, alpha 1                                                                               | 25.5 | 21.2 |
| DICNDVLSLLEK                             | C234   | NP_034236.2        | eukaryotic translation elongation factor 1<br>alpha 1                                          | 10.8 | 19.7 |
| DQGNPVCALQQILGT<br>K                     | C94    | XP_00147775<br>3.1 | PREDICTED: similar to 14-3-3 zeta<br>3.1                                                       | 32.1 | 36.4 |
| DSNNLCLHFNPR                             | C46    | NP_056599.1        | periostin, osteoblast specific factor                                                          | 89.4 | 52.6 |
| EDQSILCTGESGAGK                          | C43    | NP_032521.1        | lectin, galactose binding, soluble 1                                                           | 39.3 | 44.7 |
| EIVHIQAGQCGNQIGA<br>K                    | C172   | NP_071855.2        | myosin, heavy polypeptide 9, non-muscle<br>isoform 1                                           | 18.8 | 23.3 |
| ELAHS�AELQSCPQEE<br>GPGGR                | C12    | NP_075768.1        | tubulin, beta 3                                                                                | 30.7 | 23.6 |
| ELETVCNDVLALLDK                          | C408   | NP_038898.1        | smoothelin                                                                                     | 37.7 | 38.6 |
| EYEELCPR                                 | C97    | NP_035868.1        | tyrosine 3-monooxygenase/tryptophan 5-<br>monooxygenase activation protein, eta<br>polypeptide | 27.2 | 32.6 |
| EYLPIGGLAEFCK                            | C1010  | NP_032019.2        | fibrillin 1                                                                                    | 63.0 | 77.8 |
| FCTGLTQIETLFK                            | C106   | NP_034455.1        | glutamate oxaloacetate transaminase 2,<br>mitochondrial                                        | 16.2 | 10.9 |
| FEELCSDLFR                               | C254   | NP_067248.1        | creatine kinase, brain                                                                         | 23.0 | 14.4 |
| FNAHGANTIVCNTK                           | C306   | NP_034608.2        | heat shock 70kDa protein 1B                                                                    | 37.6 | 37.1 |
| FNAILCSR                                 | C61    | NP_032521.1        | lectin, galactose binding, soluble 1                                                           | 45.2 | 42.1 |
| FSSGITGCIK                               | C180   | XP_00147301<br>3.1 | PREDICTED: similar to Annexin A11<br>3.1                                                       | 42.5 | 27.9 |
| FTPAVCGLR                                | -      | XP_00147736<br>5.1 | PREDICTED: similar to perlecan (heparan<br>sulfate proteoglycan 2)                             | 63.6 | 59.2 |
| FVFHNEQVYCPDCAK                          | -      | NP_00110702<br>1.1 | latent transforming growth factor beta<br>binding protein 4 isoform b                          | 79.0 | 90.3 |
|                                          | C273;C | NP_034341.2        | four and a half LIM domains 1 isoform 3                                                        | 31.3 | 46.5 |

|                               | 276   |                |                                                                                                                                                                          |      |      |
|-------------------------------|-------|----------------|--------------------------------------------------------------------------------------------------------------------------------------------------------------------------|------|------|
| GCDVVVIPAGVPR                 | C93   | NP_032643.2    | malate dehydrogenase 2, NAD (mitochondrial)                                                                                                                              | 24.8 | 30.5 |
| GCTFLVGLIQK                   | C405  | NP_033924.2    | calpain 2                                                                                                                                                                | 35.7 | 33.6 |
| GFQFVSSSLPDICYR               | -     | NP_001103215.1 | cellular nucleic acid binding protein isoform 2                                                                                                                          | 65.1 | 69.3 |
| GHFFVEDQIYCEK                 | C305  | NP_058557.2    | carboxyl terminal LIM domain protein 1                                                                                                                                   | 40.3 | 32.9 |
| GIFPVLCK                      | C474  | NP_035229.2    | pyruvate kinase, muscle                                                                                                                                                  | 17.9 | 3.7  |
| GLGTDEDSLIEIICSR              | C133  | XP_001474833.1 | PREDICTED: similar to Annexin A2 (Annexin II) (Lipocortin II) (Calpactin I heavy chain) (Chromobindin-8) (p36) (Protein I) (Placental anticoagulant protein IV) (PAP-IV) | 14.5 | 30.7 |
| GQCVKPLFGAVTK                 | C672  | NP_032019.2    | fibrillin 1                                                                                                                                                              | 76.3 | 87.4 |
| GSHCSGSGDPAEYNLR              | C572  | NP_001002011.2 | lamin A isoform A                                                                                                                                                        | 26.9 | 26.7 |
| GSLGTSGETCR                   | C892  | NP_032331.2    | perlecan (heparan sulfate proteoglycan 2)                                                                                                                                | 63.8 | 69.1 |
| GTFASLSELHCDK                 | C94   | NP_058652.1    | hemoglobin, beta adult minor chain                                                                                                                                       | 20.3 | 26.4 |
| GVVNFVAVITDGHVTVG<br>SPCGGIK  | C185  | NP_666119.1    | collagen, type VI, alpha 2                                                                                                                                               | 69.0 | 85.7 |
| HEQNIDCGGGYVK                 | C105  | NP_031617.1    | calreticulin                                                                                                                                                             | 31.0 | 27.7 |
| HFCPNVPIILVGNK                | C107  | NP_031510.2    | ras homolog gene family, member C                                                                                                                                        | 20.8 | 15.3 |
| HPNSFICK                      | C288  | NP_032786.1    | osteoglycin                                                                                                                                                              | 52.9 | 47.3 |
| HSQTTDDPLCPPGTK               | -     | NP_034061.2    | collagen, type IV, alpha 1                                                                                                                                               | 83.8 | 69.6 |
| IASVKPSDAGTYVCQ<br>AQNALGTAQK | -     | XP_001477365.1 | PREDICTED: similar to perlecan (heparan sulfate proteoglycan 2)                                                                                                          | 69.4 | 78.1 |
| IDQLECDHQLIQEALIF<br>DNK      | C690  | NP_598917.1    | actinin, alpha 1                                                                                                                                                         | 4.1  | 10.0 |
| IIPGFMCQGGDFTR                | C62   | XP_001002180.2 | PREDICTED: hypothetical protein                                                                                                                                          | 32.8 | 22.3 |
| ILYSQCGDVM*R                  | C32   | NP_034990.1    | myosin, light polypeptide 6, alkali, smooth muscle and non-muscle                                                                                                        | 52.4 | 35.6 |
| IQLEHHISPGDFPDCQ<br>K         | C356  | NP_694708.2    | EH-domain containing 2                                                                                                                                                   | 19.7 | 10.1 |
| IVSPSGAAVPCK                  | C1018 | NP_034357.2    | filamin, alpha                                                                                                                                                           | 2.6  | 19.6 |
| KITISDCGQL                    | C161  | XP_001002180.2 | PREDICTED: hypothetical protein                                                                                                                                          | 40.4 | 41.2 |
| KPVDQYEDCYLAR                 | C260  | NP_598738.1    | transferrin                                                                                                                                                              | 73.1 | 78.4 |
| KTYITDPVSAPCAPPL<br>QPK       | C365  | NP_848780.2    | LIM domain containing preferred translocation partner in lipoma                                                                                                          | 17.6 | 16.1 |
| LCSGVLGTVVHGK                 | C79   | NP_062732.1    | mitochondrial carrier homolog 2                                                                                                                                          | 16.4 | 25.2 |
| LCYVALDFENEMATAA<br>SSSSLEK   | C219  | NP_033738.1    | actin, alpha, cardiac                                                                                                                                                    | 14.7 | 37.3 |
| LFACSNR                       | C670  | NP_666232.2    | gelsolin                                                                                                                                                                 | 7.9  | 26.9 |
| LFDSICNNK                     | C106  | XP_001475135.1 | PREDICTED: similar to Guanine nucleotide-binding protein G(i), alpha-2 subunit (Adenylate cyclase-inhibiting G alpha protein)                                            | 36.3 | 21.7 |
| LHQVSPVDSGEYVCR               | -     | XP_001477365.1 | PREDICTED: similar to perlecan (heparan sulfate proteoglycan 2)                                                                                                          | 38.5 | 71.6 |
| LIENICWTLM*DHLGYP<br>K        | C1193 | NP_001074785.1 | dermatan sulfate epimerase-like                                                                                                                                          | 99.0 | 98.4 |
| LLCGLLSDR                     | C81   | XP_001481126.1 | PREDICTED: similar to macrophage migration inhibitory factor isoform 2                                                                                                   | 31.2 | 41.7 |
| LPCQLHQVIVAR                  | C640  | NP_033924.2    | calpain 2                                                                                                                                                                | 49.1 | 27.9 |

|                                                 |       |                    |                                                                                                            |      |      |
|-------------------------------------------------|-------|--------------------|------------------------------------------------------------------------------------------------------------|------|------|
| LPCVAAK                                         | C211  | NP_080720.1        | citrate synthase                                                                                           | 23.3 | 24.5 |
| LPCVEDYLSAILNR                                  | -     | NP_033784.2        | albumin                                                                                                    | 91.1 | 94.6 |
| LPVVIGLLDVDCSED<br>VIK                          | C824  | NP_00100390<br>8.1 | clathrin, heavy polypeptide (Hc)                                                                           | 12.4 | 20.1 |
| LVVECVM*K                                       | C824  | NP_077717.1        | fatty acid binding protein 4, adipocyte                                                                    | 22.9 | 42.1 |
| LVVNFQCDK                                       | C669  | NP_033399.1        | transglutaminase 2, C polypeptide                                                                          | 32.0 | 31.8 |
| M*IPSLCTHGK                                     | C1041 | NP_032019.2        | fibrillin 1                                                                                                | 98.4 | 99.3 |
| NCAAYLK                                         | C836  | NP_082297.1        | myosin, heavy polypeptide 14                                                                               | 26.7 | 25.5 |
| NECFLQHK                                        | C125  | NP_033784.2        | albumin                                                                                                    | 88.4 | 83.3 |
| NFHENCYR                                        | C334  | NP_598515.3        | filamin binding LIM protein 1                                                                              | 41.0 | 58.7 |
| NIGASVEFHCAVPNER                                | C2871 | XP_00147736<br>5.1 | PREDICTED: similar to perlecan (heparan<br>sulfate proteoglycan 2)                                         | 47.7 | 65.5 |
| NLDSTTVAVHGEEIYC<br>K                           | C58   | NP_031817.1        | cysteine and glycine-rich protein 1                                                                        | 27.3 | 44.1 |
| NPLSDPLYDCIFTVEG<br>AGLTK                       | C619  | NP_033399.1        | transglutaminase 2, C polypeptide                                                                          | 11.3 | 24.7 |
| NTGIICTIGPASR                                   | C49   | NP_035229.2        | pyruvate kinase, muscle                                                                                    | 5.2  | 11.5 |
| QACILM*IK                                       | C747  | NP_038635.1        | myosin, heavy polypeptide 11, smooth<br>muscle                                                             | 19.0 | 15.0 |
| QIVSSIGLCR                                      | -     | NP_00102500<br>7.1 | nephronectin isoform b                                                                                     | 84.8 | 93.3 |
| QVQSLTCEVDALK                                   | C328  | NP_035831.2        | vimentin                                                                                                   | 13.8 | 20.2 |
| SEDCFILDHGR                                     | C329  | NP_666232.2        | gelsolin                                                                                                   | 15.8 | 28.1 |
| SICTTVLELLDK                                    | C136  | XP_00147355<br>0.1 | PREDICTED: similar to Ywhaq protein                                                                        | 44.3 | 40.3 |
| SPVQCVSPELALTIAL<br>NPGGRPK                     | C1079 | XP_619639.3        | PREDICTED: tensin 1                                                                                        | 27.9 | 25.1 |
| SQSVRPGADVTFICTA<br>K                           | C1265 | XP_00147736<br>5.1 | PREDICTED: similar to perlecan (heparan<br>sulfate proteoglycan 2)                                         | 53.7 | 75.8 |
| SSCISQHVISEAK                                   | C395  | NP_783572.2        | latent transforming growth factor beta<br>binding protein 4 isoform a                                      | 62.9 | 89.0 |
| STLTDSLVCCK                                     | C41   | NP_031933.1        | eukaryotic translation elongation factor 2                                                                 | 20.7 | 33.5 |
| TDQVCINLR                                       | -     | XP_00147226<br>6.1 | PREDICTED: similar to Epidermal growth<br>factor-containing fibulin-like extracellular<br>matrix protein 1 | 83.3 | 97.9 |
| TFCQLILDPIFK                                    | C290  | NP_031933.1        | eukaryotic translation elongation factor 2                                                                 | 12.2 | 22.4 |
| TLTGTVIDSGDGVTHV<br>IPVAEGYVIGSCIK<br>TNLLQVCER | -     | NP_076224.1        | ARP3 actin-related protein 3 homolog                                                                       | 20.3 | 25.2 |
| TPCEEILVK                                       | C985  | NP_033528.3        | vinculin                                                                                                   | 14.1 | 19.7 |
| TVCAHEELLR                                      | C290  | NP_034357.2        | filamin, alpha                                                                                             | 0.8  | 0.8  |
| TVFAEHISDECK                                    | -     | NP_032572.1        | microfibril-associated glycoprotein 2                                                                      | 87.5 | 96.9 |
| TVYHAEVQCDGR                                    | C114  | XP_00147731<br>4.1 | PREDICTED: similar to ribosomal protein<br>L3 isoform 1                                                    | 26.6 | 18.8 |
| VCHLVGINVTDFTFR                                 | C25   | NP_031818.3        | cysteine and glycine-rich protein 2                                                                        | 42.6 | 56.9 |
| VCNPIITK                                        | C382  | NP_038635.1        | myosin, heavy polypeptide 11, smooth<br>muscle                                                             | 27.1 | 25.1 |
| VCRTWLYNLK                                      | C603  | NP_112442.2        | heat shock protein 8                                                                                       | 6.3  | 6.4  |
| VEDMAELTCLNEASVL<br>HNLR                        | C1217 | XP_00148138<br>0.1 | PREDICTED: doublecortin domain<br>containing 5                                                             | 4.6  | 2.6  |
| VGELCAGK                                        | C95   | NP_038635.1        | myosin, heavy polypeptide 11, smooth<br>muscle                                                             | 12.7 | 22.4 |
| VGINDFCPMGFVK                                   | C313  | NP_033528.3        | vinculin                                                                                                   | 40.3 | 62.2 |
| VGTECGNQK                                       | C322  | NP_031568.2        | biglycan                                                                                                   | 65.2 | 45.7 |
|                                                 | C574  | NP_034357.2        | filamin, alpha                                                                                             | 27.8 | 31.8 |

|                                  |       |                    |                                                                                         |      |      |
|----------------------------------|-------|--------------------|-----------------------------------------------------------------------------------------|------|------|
| VGVNDFCPTVPK                     | C326  | NP_079987.2        | asporin                                                                                 | 36.6 | 51.6 |
| VHSPSGALEECYVTEI<br>DQDK         | C2370 | NP_034357.2        | filamin, alpha                                                                          | 19.5 | 53.7 |
| VLHDGGCSLPILR                    | -     | NP_783572.2        | latent transforming growth factor beta<br>binding protein 4 isoform a                   | 74.4 | 96.4 |
| VPFLVLECPNLK                     | C14   | NP_079785.1        | DC2 protein                                                                             | 11.1 | 15.8 |
| VPSGLYLGTCTER                    | C1156 | NP_032331.2        | perlecan (heparan sulfate proteoglycan 2)                                               | 61.4 | 89.9 |
| VPPTNVSVDLTCR                    | C245  | XP_00147399<br>2.1 | PREDICTED: similar to Glyceraldehyde-3-<br>phosphate dehydrogenase (GAPDH)<br>isoform 1 | 11.9 | 25.9 |
| VSHALAEGLGVIACIG<br>EK           | C127  | NP_033441.1        | triosephosphate isomerase 1                                                             | 40.2 | 37.8 |
| VTYCPTEPGNYIINIK                 | C2099 | NP_034357.2        | filamin, alpha                                                                          | 41.1 | 61.9 |
| VVQCSDLGLDK                      | C62   | NP_031859.1        | decorin                                                                                 | 45.8 | 53.9 |
| VVQCSDLGLK                       | C77   | NP_031568.2        | biglycan                                                                                | 36.5 | 49.3 |
| YGISLCQAILDETK                   | C324  | NP_034860.2        | annexin A1                                                                              | 52.6 | 21.1 |
| YLIVVTDGHPLEGYKE<br>PCGGLEDVNEAK | C168  | NP_034063.1        | collagen, type VI, alpha 1                                                              | 72.4 | 74.7 |
| YSGCLTESNLIK                     | C553  | NP_033399.1        | transglutaminase 2, C polypeptide                                                       | 33.3 | 32.3 |
| YTGHAYASGCTISPY                  | -     | NP_034858.2        | lysyl oxidase                                                                           | 88.4 | 89.1 |
| YVICVR                           | C1715 | NP_034357.2        | filamin, alpha                                                                          | 34.7 | 24.3 |
